# Supplementary material
Source: publisher figshare collection journal article supplement (https://geolsoc.figshare.com/ndownloader/files/25943339)
Supplement: Supplementary file 1 [file 25943339]

## Sheet: Supplementary Table 1
Supplementary Table 1. Parameters for isotope mixing models
		EM1 peridotite		HIMU carbonatite		Ancient SCLM§
87Sr/86Sr		0.70530*		0.70285*		0.703682
Sr (ppm)		37.5†		996‡		1109
143Nd/144Nd		0.51236*		0.51285*		0.51123
Nd (ppm)		1.76†		244‡		44.3
206Pb/204Pb		17.4*		21.8*		16.1
207Pb/204Pb		15.5*		15.9*		15.3
Pb (ppm)		0.42†		22.3‡		5.87
*Hart et al. (1992)
†Schmidberger et al. (2001)
‡Ionov and Harmer (2002)
§This study (MOX-3-33.0)
Concentrations used for our HIMU carbonatitic fluid are taken from data for minimally contaminated whole-rock carbonatite reported by Ionov and Harmer (2002). Concentrations used for our HIMU carbonatitic fluid are taken from data for minimally contaminated whole-rock carbonatite reported by Ionov and Harmer (2002)
